# Supplementary material for: Corporate social responsibility in luxury contexts: potential pitfalls and how to overcome them
Source: Springer Nature journal article supplement (doi:10.1007/s11747-020-00755-x), 2020-12-15
Supplement: MOESM1 [file 18683244]

**“Corporate Social Responsibility in luxury contexts: Potential pitfalls and how to overcome them”**

**OVERVIEW OF WEB APPENDICES**

**Appendix A.** Managerial questionnaire

**Appendix B.** Study 1: Results table with brand value growth as the dependent variable

**Appendix C.** Study 1: Ranking of the companies based on their level of luxuriousness

**Appendix D.** Study 1: Results table, time period 2002 - 2006

**Appendix E.** Study 1: Results table, time period 2004 - 2008

**Appendix F.** Study 2: Additional materials

**Appendix G.** Study 2: Results without control variables

**Appendix H.** Study 2: Correlations, means, and standard deviations

**Appendix I.** Study 2: Additional analysis on the role of guilt

**Appendix J.** Studies 3-5: Treatment texts

**Appendix K.** Study 3: Additional checks of the treatment texts

**Appendix L.** Studies 3-5: Correlations, means, and standard deviations

**A – MANAGERIAL QUESTIONNAIRE**

**Questions about the type of CSR**

A company's Corporate Social Responsibility (CSR) activities can be categorized into external and internal types.

Firm-external CSR activities are often quick and easy to implement without changing the core of the organization. They are frequently featured in CSR advertisements and highly visible to a company's external stakeholders such as customers, investors, and the wider public. For example, a company could make donations to organizations that aim to help people in need.

Firm-internal CSR activities are in many cases targeting employees, leading to real organizational change, and often incurring high costs for the company. For example, a company could expend considerable effort to supporting its employees' wellbeing.

1. Which type of CSR would you expect to be more effective for enhancing customer outcomes for a luxury company? (1 = Internal CSR, 7 = External CSR)
2. Would you rather invest in internal or external CSR if you worked as a CSR manager at a luxury company? (1 = Internal CSR, 7 = External CSR)

**Question about the framing of luxury brands**

A luxury brand can be framed in different ways. On the one hand, a luxury brand can be framed as exclusive, meaning that the brand symbolizes power and success, and its products are not available for everyone.

On the other hand, a luxury brand can be framed as sustainable, meaning that the brand symbolizes respect for the environment.

1. If you worked at a luxury company, to what extent would frame your brand as exclusive? (1 = Not at all, 7 = To a great extent)

**B – STUDY 1: RESULTS TABLE WITH BRAND VALUE GROWTH AS THE DEPENDENT VARIABLE**

To investigate whether our results also apply for other firm-level outcomes besides sales revenue growth, we extend our analysis from Study 1. In this additional analysis we used brand value growth as an alternative dependent variable acquired from the Datastream database. We studied the time period of 2008-2011, for which we were able acquire data for 53 companies from the ASSET4ESG and Datastream databases. The results (Table 1) reveal a significant negative interaction effect of CSR and luxury on brand value growth (*β* = -.56, *p* = .002). An inspection of the simple slopes of CSR on brand value growth at different values of luxuriousness indicates that CSR indeed significantly or marginally significantly reduces brand value growth at higher levels of luxury, that is, when the luxuriousness of a company’s brands and products is rated as 7 (*β* = -1.10, *p* = .03) or 6 (*β* = -.80, *p* = .05) on a seven-point scale but not when luxuriousness is rated as 5 (*β* = -.51, *p* = .11), 4 (*β* = -.22, *p* = .36), or 3 (*β* = .08, *p =* .68). Furthermore, the effect of CSR on brand value growth turns positive when the luxuriousness of a company’s brands and products is rated as 2 (*β* = .37, *p* = .03), or 1 (*β* = .66, *p* = .00), indicating that CSR can be beneficial for non-luxury companies hoping to increase their brand value growth. The results are in line with those of Study 1, as we found that for luxury companies, CSR also significantly reduces brand value growth over time.

**Table 1.** Results of the latent growth model for brand value growth

| **Path** | | **Standardized Estimates** |
| --- | --- | --- |
| **Effects on Brand Value Growth (2008-2011)** | |  |
| CSR 2007 | 🡪 Brand Value Growth | .21ns |
| Luxury | 🡪 Brand Value Growth | .29ns |
| CSR 2007 🞨 Luxury | 🡪 Brand Value Growth | -.56*** |
| **Effects on Brand Value Intercept** | |  |
| CSR 2007 | 🡪 Brand Value Intercept | .07ns |
| Luxury | 🡪 Brand Value Intercept | -.21ns |
| CSR 2007 🞨 Luxury | 🡪 Brand Value Intercept | .06ns |

Notes: ns *p* > .10, * *p* < .10, ** *p* < .05, *** *p* < .01 (two-tailed); standardized coefficients

**C - STUDY 1: RANKING OF THE COMPANIES BASED ON THEIR LEVEL OF LUXURIOUSNESS**

| Company name | Ranking on the level of luxuriousness (1-7) |
| --- | --- |
| Bulgari | 7 |
| Burberry Group PLC | 7 |
| Christian Dior SA | 7 |
| Compagnie Financiere Richemont SA | 7 |
| Hermes International SCA | 7 |
| PPR SA | 7 |
| Signet Jewelers Ltd. | 7 |
| Tiffany & Co. | 7 |
| Coach, Inc. | 6 |
| Estee Lauder Companies, Inc. | 6 |
| Guess?, Inc. | 6 |
| Luxottica Group SpA | 6 |
| LVMH Moet Hennessy Louis Vuitton SA | 6 |
| Ports Design Ltd. | 6 |
| Chocoladefabriken Lindt & Spruengli AG | 5 |
| Douglas Holding AG | 5 |
| Herman Miller, Inc. | 5 |
| Nordstrom, Inc. | 5 |
| ABC-MART, Inc. | 4 |
| Abercrombie & Fitch Co. | 4 |
| AGA Rangemaster Group PLC | 4 |
| Axis Bank Ltd. | 4 |
| Benetton Group SpA | 4 |
| Career Education Corp. | 4 |
| Carnival Corp. | 4 |
| Carnival PLC (see Carnival Corp.) | 4 |
| Cranswick PLC | 4 |
| Debenhams PLC | 4 |
| Deutsche Lufthansa AG | 4 |
| Dicks Sporting Goods, Inc. | 4 |
| Dillard's, Inc. | 4 |
| Dorel Industries, Inc. | 4 |
| Electronic Arts, Inc. | 4 |
| Empire Company Ltd. | 4 |
| Esprit Holdings Ltd. | 4 |
| Foot Locker, Inc. | 4 |
| Hershey Co. | 4 |
| Macy's, Inc. | 4 |
| Marks and Spencer Group PLC | 4 |
| NIKE, Inc. | 4 |
| Saks, Inc. | 4 |
| Shiseido Company, Ltd. | 4 |
| Timberland Company (The) | 4 |
| Aaron's, Inc. | 3 |
| ACE Ltd. | 3 |
| Activision Blizzard, Inc. | 3 |
| adidas AG | 3 |
| Arab Bank PLC | 3 |
| ASICS Corp. | 3 |
| Avon Products, Inc. | 3 |
| Banca Popolare di Sondrio | 3 |
| Bank Sarasin & Cie AG | 3 |
| British Airways PLC | 3 |
| Britvic PLC | 3 |
| Brown-Forman Corp. | 3 |
| Cadbury PLC | 3 |
| Campbell Soup Company | 3 |
| Casino Guichard Perrachon SA | 3 |
| Cathay Pacific Airways Ltd. | 3 |
| Cencosud SA | 3 |
| Chico's FAS, Inc. | 3 |
| Church & Dwight Co., Inc. | 3 |
| Circuit City Stores, Inc. | 3 |
| Credit Agricole SA | 3 |
| CVS Caremark Corp. | 3 |
| Darden Restaurants, Inc. | 3 |
| Delhaize Group | 3 |
| Dignity PLC | 3 |
| Dixons Retail PLC | 3 |
| Dollar General Corp. | 3 |
| Domino'S Pizza Group PLC | 3 |
| Dunelm Group PLC | 3 |
| easyJet PLC | 3 |
| Ebro Foods SA | 3 |
| Education Management Corp. | 3 |
| Etablissementen Franz Colruyt NV | 3 |
| H & M Hennes & Mauritz AB | 3 |
| Jeronimo Martins SGPS SA | 3 |
| Kohl's Corp. | 3 |
| N Brown Group PLC | 3 |
| PT Unilever Indonesia Tbk | 3 |
| Puma AG Rudolf Dassler Sport | 3 |
| TUI AG | 3 |
| TUI Travel PLC (2014 merger with TUI AG) | 3 |
| Tupperware Brands Corp. | 3 |
| Unilever N.V. | 3 |
| Unilever PLC (see Unilever NV) | 3 |
| Urban Outfitters, Inc. | 3 |
| VF Corp. | 3 |
| Walgreen Company | 3 |
| Williams-Sonoma, Inc. | 3 |
| ABN Amro Holding NV | 2 |
| Accor SA | 2 |
| Admiral Group PLC | 2 |
| AEGON N.V. | 2 |
| AEON CO., Ltd. | 2 |
| AEON Mall Co., Ltd. | 2 |
| Aeropostale, Inc. | 2 |
| Aetna Inc. | 2 |
| AFLAC Inc. | 2 |
| Alberto Culver Company | 2 |
| American Eagle Outfitters | 2 |
| AOYAMA TRADING Co., Ltd. | 2 |
| Axfood AB | 2 |
| Barnes & Noble, Inc. | 2 |
| Bed Bath & Beyond, Inc. | 2 |
| Best Buy Co., Inc. | 2 |
| Billabong International Ltd. | 2 |
| Bosideng International Holdings Ltd. | 2 |
| BRF SA | 2 |
| British American Tobacco PLC | 2 |
| Brookdale Senior Living, Inc. | 2 |
| Bwin Interactive Entertainment AG | 2 |
| Bwin.party Digital Entertainment PLC (see BWIN Interactive) | 2 |
| Canadian Tire Corporation Ltd. | 2 |
| Carrefour SA | 2 |
| Cattles PLC | 2 |
| China Communications Construction Co Ltd. | 2 |
| Continental Airlines, Inc. | 2 |
| David Jones Ltd. | 2 |
| Delta Air Lines, Inc. | 2 |
| Dollar Tree, Inc. | 2 |
| Fast Retailing Co Ltd. | 2 |
| Fielmann AG | 2 |
| Finning International Inc. | 2 |
| Folli-Follie SA | 2 |
| GameStop Corp. | 2 |
| Giordano International Ltd. | 2 |
| Halfords Group PLC | 2 |
| Hasbro, Inc. | 2 |
| Herbalife Ltd. | 2 |
| Hindustan Unilever Ltd. | 2 |
| HMV Group PLC | 2 |
| Home Retail Group PLC | 2 |
| Homeserve PLC | 2 |
| Housing Development Finance Corp. | 2 |
| Inditex SA | 2 |
| J D Wetherspoon PLC | 2 |
| J.C. Penney Company, Inc. | 2 |
| Japan Airlines Corp. | 2 |
| Jarden Corp. | 2 |
| JJB Sports PLC | 2 |
| Kellogg Company | 2 |
| Kesko Oyj | 2 |
| Kimberly Clark Corp. | 2 |
| Li Ning Co. Ltd. | 2 |
| Magnit OAO | 2 |
| Mattel, Inc. | 2 |
| MITSUKOSHI Ltd. | 2 |
| Mothercare PLC | 2 |
| Netcare Ltd. | 2 |
| Nintendo Co., Ltd | 2 |
| Nobia AB | 2 |
| Oriflame Cosmetics SA | 2 |
| Pepsiamericas, Inc. | 2 |
| PepsiCo, Inc. | 2 |
| Petra Foods Ltd. | 2 |
| Promise Co., Ltd. | 2 |
| RadioShack Corp. | 2 |
| Ross Stores, Inc. | 2 |
| S.A.C.I. Falabella | 2 |
| Shimachu Co., Ltd. | 2 |
| SHIMAMURA Co., Ltd. | 2 |
| Specialty Fashion Group Ltd. | 2 |
| Sports Direct International PLC | 2 |
| SQUARE ENIX HOLDINGS CO., Ltd. | 2 |
| Starbucks Corp. | 2 |
| Takashimaya Company, Ltd. | 2 |
| Tesco PLC | 2 |
| The Cheesecake Factory, Inc. | 2 |
| The Coca-Cola Company | 2 |
| The Forzani Group Ltd. | 2 |
| The Game Group PLC | 2 |
| The Gap, Inc. | 2 |
| The Home Depot, Inc. | 2 |
| The Madison Square Garden Co. | 2 |
| The New York Times Company | 2 |
| The Restaurant Group PLC | 2 |
| The Swatch Group Ltd. | 2 |
| The Walt Disney Company | 2 |
| The Washington Post Company | 2 |
| Thomas Cook Group PLC | 2 |
| Tim Hortons, Inc. | 2 |
| Tractor Supply Company | 2 |
| Travis Perkins PLC | 2 |
| UNITE Group PLC | 2 |
| Wal-Mart de Mexico S A B de C V | 2 |
| Wal-Mart Stores, Inc. (see Wal-Mart de Mexico) | 2 |
| Weight Watchers International, Inc. | 2 |
| WH Smith PLC | 2 |
| Whole Foods Market, Inc. | 2 |
| Wm. Morrison Supermarkets PLC | 2 |
| Yakult Honsha Co., Ltd. | 2 |
| Acom Co., Ltd. | 1 |
| Alimentation Couche-Tard, Inc. | 1 |
| Alleanza | 1 |
| Big Lots, Inc. | 1 |
| BIM Birlesik Magazalar A.S. | 1 |
| Burger King Holdings, Inc. | 1 |
| Cafe de Coral Holdings Ltd. | 1 |
| Chipotle Mexican Grill, Inc. | 1 |
| Cia Brasil. de Distrib. Pao de Acucar | 1 |
| DeVry, Inc. | 1 |
| Family Dollar Stores, Inc. | 1 |
| FamilyMart Co., Ltd. | 1 |
| Flight Centre Ltd. | 1 |
| Flowers Foods, Inc. | 1 |
| Flughafen Wien AG | 1 |
| Gildan Activewear, Inc. | 1 |
| GOME Electrical Appliances Holding Ltd. | 1 |
| Great Canadian Gaming Corp. | 1 |
| Grupo Elektra SA de CV | 1 |
| H2O RETAILING Corp. | 1 |
| Hanesbrands, Inc. | 1 |
| Health Net, Inc. | 1 |
| Iberia SA | 1 |
| J Sainsbury PLC | 1 |
| J.Front Retailing Co., Ltd. | 1 |
| Kathmandu Holdings Ltd. | 1 |
| KIKKOMAN Corp. | 1 |
| Kingfisher PLC | 1 |
| Koninklijke Ahold N.V. | 1 |
| LATAM Airlines Group SA | 1 |
| LAWSON, Inc. | 1 |
| Loblaw Companies Ltd. | 1 |
| Lottomatica Group SpA | 1 |
| Lowe's Companies, Inc. | 1 |
| McDonald's Corp. | 1 |
| McDonald's Holdings Company (Japan), Ltd (see McDonald´s Corp.) | 1 |
| NAMCO BANDAI Holdings, Inc. | 1 |
| Newell Rubbermaid, Inc. | 1 |
| NISSIN FOODS HOLDINGS CO., Ltd. | 1 |
| Panera Bread Co | 1 |
| Priceline.com, Inc. | 1 |
| Regal Entertainment Group | 1 |
| RONA, Inc. | 1 |
| Safeway, Inc. | 1 |
| SAS AB | 1 |
| Sears Canada, Inc. | 1 |
| Sears Holdings Corp. | 1 |
| Seven & i Holdings Co., Ltd. | 1 |
| Shinsegae Co., Ltd. | 1 |
| Shoppers Drug Mart Corp. | 1 |
| SLM Corp. | 1 |
| Spar Group Ltd. | 1 |
| SSL International PLC | 1 |
| Strayer Education, Inc. | 1 |
| SUPERVALU, Inc. | 1 |
| Tabcorp Holdings Ltd. | 1 |
| Tatts Group Ltd. | 1 |
| The Kroger Co. | 1 |
| The North West Company, Inc. | 1 |
| The Pepsi Bottling Group, Inc. | 1 |
| The Reject Shop Ltd. | 1 |
| Topps Tiles PLC | 1 |
| TRADUS PLC | 1 |
| WestJet Airlines Ltd. | 1 |
| Woolworths Group PLC | 1 |

**D – STUDY 1: RESULTS TABLE, TIME PERIOD 2002 – 2006**

| **Path** | | **No Controls** | | | **Time-Invariant Controls Only** | **Time-Variant**  **+ Invariant Controls** | |
| --- | --- | --- | --- | --- | --- | --- | --- |
| **Hypothesized Effects on Sales Revenue Growth** | |  | |  | |  |
| CSR 2002 | 🡪 Sales Revenue Growth | | .17ns | | .13ns | .14ns | |
| Luxury1 | 🡪 Sales Revenue Growth | | -1.75ns | | -2.07ns | -3.46** | |
| CSR 2002 🞨 Luxury | 🡪 Sales Revenue Growth | | -.20** | | -.14** | -.14** | |
| **Hypothesized Effects on Sales Revenue Intercept** | | |  | |  |  | |
| CSR 2002 | 🡪 Sales Revenue Intercept | | 1.68*** | | .70** | .57ns | |
| Luxury | 🡪 Sales Revenue Intercept | | -18.72*** | | -1.90ns | -7.72* | |
| CSR 2002 🞨 Luxury | 🡪 Sales Revenue Intercept | | -.01ns | | .05ns | -.16ns | |
| **Controlled Effects on Sales Revenue (Quadratic) Growth** | | |  | |  |  | |
| CSR 2002 | 🡪 Sales Revenue Quadratic  Growth | | -.03ns | | -.02ns | -.07ns | |
| Luxury | 🡪 Sales Revenue Quadratic  Growth | | .29ns | | .61ns | .78* | |
| CSR 2002 🞨 Luxury | 🡪 Sales Revenue Quadratic  Growth | | .05*** | | .04** | .04** | |
| Sales Revenue Intercept | 🡪 Sales Revenue Growth | | -.00ns | | -.03ns | -.02ns | |
| **Controlled Effects on Sales Revenue Intercept** | | |  | |  |  | |
| Average marketing expenditure (ln) | 🡪 Sales Revenue Intercept | |  | | 20.88*** | 21.07*** | |
| Number of employees (ln) | 🡪 Sales Revenue Intercept | |  | | 105.96*** | 66.81*** | |
| Return on assets 2002 | 🡪 Sales Revenue Intercept | |  | | -337.40* | -330.13* | |
| **Controlled Effects on Sales Revenue Growth** | | |  | |  |  | |
| Average marketing expenditure | 🡪 Sales Revenue Growth (ln) | |  | | -5.24* | -5.49* | |
| Number of employees (ln) | 🡪 Sales Revenue Growth | |  | | 11.15ns | 5.53ns | |
| Return on assets 2002 | 🡪 Sales Revenue Growth | |  | | 237.01*** | 243.09*** | |
| **Further Controlled Effects** | | |  | |  |  | |
| Average marketing expenditure (ln) | 🡪 Sales Revenue Quadratic  Growth | |  | | 1.54** | 1.73** | |
| Number of employees (ln) | 🡪 Sales Revenue Quadratic  Growth | |  | | -.42ns | -.16ns | |
| Return on assets 2002 | 🡪 Sales Revenue Quadratic  Growth | |  | | -66.07** | -64.35** | |
| CSR Score 2003/ 2004/2005/2006 | 🡪 Sales Revenue Intercept | |  | |  | Included | |
| CSR Score 2003/ 2004/2005/2006 | 🡪 Sales Revenue Growth | |  | |  | Included | |
| CSR Score 2003/ 2004/2005/2006 | 🡪 Sales Revenue Quadratic  Growth | |  | |  | Included | |
| All autoregressive effects of CSR Scores 2002-2006 | | |  | |  | Included | |
| | **Model characteristics** | |  |  |  | | --- | --- | --- | --- | --- | | CFI / TLI | .92 / .72 .96 / .86 .96 / .91 | |  |  | .00ns |  | -.00ns | | SRMR / RMSEA | .03 / .24 .03 / .15 .05 / .10 .01/.0 | |  |  | | n | 84 | |  |  | | | | | | | | | |

Notes: n.s. *p* > .10, * *p* < .10, ** *p* < .05, *** *p* < .01 (one-tailed); unstandardized coefficients, 1Luxury is coded as 0 for non-luxury firms

**E – STUDY 1: RESULTS TABLE, TIME PERIOD 2004 – 2008**

| **Path** | | **No Controls** | | | **Time-Invariant Controls Only** | **Time-Variant**  **+ Invariant Controls** | |
| --- | --- | --- | --- | --- | --- | --- | --- |
| **Hypothesized Effects on**  **Sales Revenue Growth** | |  | |  | |  |
| CSR 2004 | 🡪 Sales Revenue Growth | | .34** | | .33** | .40*** | |
| Luxury1 | 🡪 Sales Revenue Growth | | 1.06ns | | 1.03ns | 1.50ns | |
| CSR 2004 🞨 Luxury | 🡪 Sales Revenue Growth | | -.11* | | -.11* | -.08* | |
| **Hypothesized Effects on**  **Sales Revenue Intercept** | | |  | |  |  | |
| CSR 2004 | 🡪 Sales Revenue Intercept | | 1.60*** | | 1.01*** | .49ns | |
| Luxury | 🡪 Sales Revenue Intercept | | -14.43*** | | -11.91*** | -12.13*** | |
| CSR 2004 🞨 Luxury | 🡪 Sales Revenue Intercept | | -.15ns | | -.18* | -.21* | |
| **Controlled Effects on Sales Revenue (Quadratic) Growth** | | |  | |  |  | |
| CSR 2004 | 🡪 Sales Revenue Quadratic  Growth | | -.12*** | | -.12*** | -.11** | |
| Luxury | 🡪 Sales Revenue Quadratic  Growth | | .01ns | | -.12ns | -.30ns | |
| CSR 2004 🞨 Luxury | 🡪 Sales Revenue Quadratic  Growth | | .04* | | .04* | .03ns | |
| Sales Revenue Intercept | 🡪 Sales Revenue Growth | | .01*** | | .09* | .09** | |
| **Controlled Effects on Sales Revenue Intercept** | | |  | |  |  | |
| Average marketing expenditure (ln) | 🡪 Sales Revenue Intercept | |  | | 22.04*** | 20.70*** | |
| Number of employees (ln) | 🡪 Sales Revenue Intercept | |  | | 48.15*** | 47.42*** | |
| Return on assets 2004 | 🡪 Sales Revenue Intercept | |  | | -308.52*** | -300.09*** | |
| **Controlled Effects on Sales Revenue Growth** | | |  | |  |  | |
| Average marketing expenditure | 🡪 Sales Revenue Growth (ln) | |  | | -.15ns | .32ns | |
| Number of employees (ln) | 🡪 Sales Revenue Growth | |  | | 3.82ns | 4.26ns | |
| Return on assets 2004 | 🡪 Sales Revenue Growth | |  | | -40.85ns | -44.25* | |
| **Further Controlled Effects** | | |  | |  |  | |
| Average marketing expenditure (ln) | 🡪 Sales Revenue Quadratic  Growth | |  | | .09ns | -.04ns | |
| Number of employees (ln) | 🡪 Sales Revenue Quadratic  Growth | |  | | -.48ns | -.59ns | |
| Return on assets 2004 | 🡪 Sales Revenue Quadratic  Growth | |  | | 23.48** | 21.85** | |
| CSR Score 2005/ 2006/2007/2008 | 🡪 Sales Revenue Intercept | |  | |  | Included | |
| CSR Score 2005/ 2006/2007/2008 | 🡪 Sales Revenue Growth | |  | |  | Included | |
| CSR Score 2005/ 2006/2007/2008 | 🡪 Sales Revenue Quadratic  Growth | |  | |  | Included | |
| All autoregressive effects of CSR Scores 2004-2008 | | |  | |  | Included | |
| | **Model characteristics** | |  | | --- | --- | --- | | CFI / TLI | .90 / .64 .90 / .62 .92 / .80 | |  |  | .00ns | | SRMR / RMSEA | .03 / .20 .02 / .19 .08 / .13 .01/.09 | | | n | 134 | | | | | | | | | | |

Notes: n.s. *p* > .10, * *p* < .10, ** *p* < .05, *** *p* < .01 (one-tailed); unstandardized coefficients, 1Luxury is coded as 0 for non-luxury firms

**F – STUDY 2: ADDITIONAL MATERIALS**

**Training of frontline employees**

All frontline employees in Study 2 received a detailed script including a guideline stating when and how to communicate the company’s stance on CSR during the sales encounter using the CSR information leaflets (Table 1). We taught the sales representatives to follow a standardized procedure to either communicate or not communicate the CSR information. The frontline employees in both the luxury and non-luxury group alternated their use of the strategies, switching from customer to customer. Importantly, the participating frontline employees were blind to the goals of the study.

We trained the participating frontline employees intensively to ensure rigorous implementation of our research design. After discussing the process in detail, the frontline employees simulated the potential sales encounter with an actor assuming the role of the customer. We filmed the employees during this simulation to analyze their performance and provide feedback on their implementation of the study design. During the first days of the field experiment, we unobtrusively observed and reviewed several sales encounters to ensure the correct experimental procedure.

**Table 1.** Content of the information leaflets (translated from German to English)

| **CSR condition** | **No CSR condition** |
| --- | --- |
| **The participants received a leaflet with the following text (please note that we have removed all identifying information to protect the anonymity of the social cause):**  The Association  The non-profit organization (name of social cause) was founded in 2001 with the aim to support and promote local children and adolescents with a weak social background. We regard it as our task to give these children and adolescents equal opportunities and to equip them with self-confidence and future perspectives.  In two (name of social cause) houses we offer our (name of social cause) children:  - A regular, healthy lunch  - Help with their homework  - Sports activities  - Memberships in sports clubs  - Musical education  - Excursions  - And much more  The (name of social cause) houses  (Name of social cause) House 1: In 2008, the association opened the (Name of social cause) House 1 in (location), in which more than 50 children from three elementary schools are being looked after by six employed educators. Another 15 children are cared for in a separate (name of group) group. In close collaboration with the youth welfare office of the (city where the social cause operates) and a district coordinator who is a resident in the house, parental support is also provided.  (Name of social cause) House 2: In June 2013, the (name of social cause) House 2 in (location) was opened with great financial support from (name of supporting foundation 1). In addition to this foundation, (name of supporting foundation 2), as another important partner, ensures the operation of the house. Here, another 100 children receive support from (name of social cause). Together with the (name of a second social cause), the (name of social cause) realizes as a pilot project the concept of a family school in which the parents are integrated into the care work.  The Members  With more than 270 members, including businessmen from (city where the social cause operates) in the first place, the (name of social cause) has developed within a few years into a significant social organization for children and adolescents in our region. With your membership fees, you enable a continuous and sustainable promotion of our children and thus secure the financial foundation of our work. For more information about membership, donations, or godparenting, please visit: (website address).”  The Events  The members meet regularly for membership meetings and to help with fundraisers, events organized for the children, and other initiatives. In addition, the (name of social cause) annually organizes the (name of social cause) Charity Golf Cup (now the fourth largest golf charity event in our country). Thanks to the generous support of the sponsors and participants of the event, a part of the association's work for the (name of social cause) children will be financed, thus ensuring the sustainable success of the projects of the (name of social cause). On the other hand, the association organizes the charity concert series (name of concert series) with selected singers and artists in the magical ambience of the (location). We are looking forward to further support! Feel free to give us a call!  The Board  (Pictures and names of five board members)  Contact Information  (Address)  (Telephone number)  (Fax)  (Email address)  (Website address)  Donation Account  (Bank account number)  **In addition to the leaflets, the following information was included in the questionnaire:**  As part of its social commitment, the company is, among other things, involved in the following project:  The non-profit organization (name) was founded in 2001 with the aim to support local children and young people with a socially weak background. The children receive a healthy and fresh lunch every day, are helped with their homework, can take advantage of various sports activities or take courses in violence prevention. During the school holidays, adventurous game actions and group excursions are offered. The company continuously supports the work of the non-profit organization through regular donations. | **The participants received a leaflet with the following text (please note that we have removed all identifying information to protect the anonymity of the company):**  Our commitment: Mobility for those who expect more  Cars are our passion – from the beginning: Since the pioneering days of Carl Benz and Gottlieb Daimler, (company name) has been active in vehicle manufacturing and retailing for more than 100 years as a partner of (car brand 1).  Much has changed since the early days. We are changing too: For our customers, who have the highest demands on their mobility. For the people who expect more. For people like you.  Our Brands  For a century, the cars of (car manufacturer 1) have come first: The car brands (car brand 1) and (car brand 2) are our leading brands in (area in Germany 1) and (area in Germany 2). The Italian luxury brands (car brand 3) and (car brand 4) are represented at the (name of the company’s luxury branch) since 2003. (Name of the company’s second branch) represents (car brand 5) currently in two locations in (area in Germany 1), and (car brand 6) is represented in two locations by (name of the company’s third branch).  In the area of ​​commercial vehicles, (company name) provides authorized sales and service for the (car manufacturer 1) brands (car brand 1) and (car brand 7). (Name of the company’s fourth branch) specializes in vehicle construction, repairs and paint finishes. (Car service brand 1) stands for comprehensive bus service.  Locations  (Company name) has a very strong presence in (area in Germany 3). From (city name) to (city name), from (city name) to (city name). In (area in Germany 2), (company name) operates three centers for passenger cars and commercial vehicles.  *General Company Information*  *This passage is removed to protect the company’s anonymity. The passage included information about the company’s branches, founding year, and number of employees.*  With a portfolio of currently seven automobile brands, (company name) offers a comprehensive selection of cars - from (car brand 1) to (car brand 5) and (car brand 6) to the Italian luxury brands (car brand 3) and (car brand 4), from micro cars to heavy trucks or buses and municipal vehicles.  Questions, wishes, or suggestions – (company name) is there for you  Do you have questions about our used cars or our promotions? You can reach our contact persons:  (Opening hours)  (Telephone)  (Fax)  Our commitment:  Tradition from Passion.  Competence from Experience. |

**Validity check of the experimental groups**

We checked for the validity of the experimental groups in Study 2 by comparing the characteristics of the respondents across the experimental groups. The analysis (Table 2) shows that there are no major differences, except for a higher level of income in the luxury groups.

**Table 2.** Validity check of the experimental groups

| **Type of Brand** | **Luxury Brand Non-Luxury Brand** | | | |
| --- | --- | --- | --- | --- |
| **CSR Communication** | **CSR Non-CSR** | | **CSR Non-CSR** | |
| **Mean Age** | 43 | 45 | 38 | 37 |
| **Incomea** | 7 | 7 | 3 | 4 |
| **Car Ownership(% without Car)** | 100% | 100% | 93.9% | 87.9% |

a Measured on an interval scale: (1) up to 1000€, (2) 1001-2000€, (3) 2001-3000€, (4) 3001-4000€, (5) 4001-5000€, (6) 5001-10000€, (7) 10001-15000€, (8) more than 15000€; the median per group is displayed.

**G - STUDY 2: RESULTS WITHOUT CONTROL VARIABLES**

To assess the results of Study 2 without the control variables, we replicated the analyses in the manuscript without any covariates. Thus, we began with two-way ANOVA, in which luxury (coded as 1 for luxury company and 0 for non-luxury company) and CSR (coded as 1 for CSR and 0 for non-CSR) were the independent variables, and loyalty intentions were the dependent variable. This analysis revealed a non-significant main effect of luxury (*F*(1,132) = 2.56, *p* = .11), a marginally significant main effect of CSR (*F*(1,132) = 3.52, *p* = .06), and a non-significant interaction effect of CSR and luxury on loyalty intentions (*F*(1,132) = .003, *p* = .96). As a next step, we ran a similar two-way ANOVA with extrinsic CSR attributions as the dependent variable. The results revealed non-significant main effects of luxury (*F*(1,131) = 2.05, *p* = .15), and CSR (*F*(1,131) = 1.13, *p* = .29), and a non-significant interaction effect of the CSR and luxury dummies on extrinsic CSR attributions (*F*(1,131) = 2.40, *p* = .12). Additionally, we replicated the moderated mediation analysis using SPSS Process Macro v. 2.16.3 (Hayes 2018, Model 7, 5,000 bootstrap samples). In the analysis, the CSR dummy was the independent variable, the luxury dummy was the moderator, extrinsic CSR attributions were the mediator, and loyalty intentions were the dependent variable. As expected based on the ANOVA results, we did not find a significant moderated mediation (index of moderated mediation = -.09, 95% CI: -.30, .01). Thus, the analysis reveals that the results presented in the manuscript remain similar in terms of the direction of the coefficients, but there are changes in the significance levels when the control variables are not included in the model. The results are reported in Table 1.

|  | Unstandardized coefficient (p-value) | s.e. | | | t | | 95% CIs | |
| --- | --- | --- | --- | --- | --- | --- | --- | --- |
| **Direct effects on Extrinsic CSR Attributions** | | | | | | | | |
| CSRa | -.13ns | | .39 | -.34 | | -.91 to .65 | | |
| Luxuryb | -.81** | | .38 | -2.12 | | -1.58 to -.05 | | |
| **Interaction effects on Extrinsic CSR Attributions** | | | | | | | | |
| CSR x Luxury | .85ns | | .55 | 1.55 | | -.23 to 1.93 | | |
| **Direct effects on Loyalty Intentions** | | | | | | | | |
| Extrinsic CSR Attributions | -.11** | | .04 | -2.54 | | -.20 to -.02 | | |
| CSR | -.24* | | .14 | -1.68 | | -.51 to .04 | | |
|  | Effect | | s.e.c |  | | 95% CIsc | | |
| **Conditional Indirect Effects of CSR on Loyalty Intentions via Extrinsic CSR Attributions** | | | | | | | | |
| No Luxury | .01 | | .05 | - | | -.08 to .14 | | |
| Luxury | -.08 | | .05 | - | | -.22 to -.01 | | |
| **Index of moderated mediation = -.09, LLCI = -.30, ULCI = .01** | | | | | | | |  |

**Table 1.** Moderated mediation (SPSS Process Model 7)

Notes: n.s. *p* > .10, * *p* < .10, ** *p* < .05, *** *p* < .01; CI = Confidence Interval, s.e. = standard error. a Dummy: No CSR (0) vs. CSR (1). b Dummy: No luxury (0) vs. luxury (1). cBootstrapped.

**H – STUDY 2: CORRELATIONS, MEANS, AND STANDARD DEVIATIONS**

| **Variables** | **1** | **2** | **3** | **4** | **5** | **6** | **7** | **8** | **9** | **10** | **11** | **12** |
| --- | --- | --- | --- | --- | --- | --- | --- | --- | --- | --- | --- | --- |
| **1. Loyalty intentions** | - |  |  |  |  |  |  |  |  |  |  |  |
| **2. Extrinsic CSR Attributions** | -.23** | - |  |  |  |  |  |  |  |  |  |  |
| **3. CSRa** | -.16* | .10ns | - |  |  |  |  |  |  |  |  |  |
| **4. Luxuryb** | -.14ns | -.12ns | .00ns | - |  |  |  |  |  |  |  |  |
| **5. Salesperson’s customer orientation** | .02ns | .01ns | .06ns | .02ns | - |  |  |  |  |  |  |  |
| **6. Salesperson’s warmth** | -.01ns | .09ns | .17** | -.11ns | .65*** | - |  |  |  |  |  |  |
| **7. Salesperson’s selling orientation** | -.20** | -.01ns | .03ns | .28*** | -.43*** | -.51*** | - |  |  |  |  |  |
| **8. Authenticity of salesperson’s emotional display** | .19** | .01ns | .01ns | -.03ns | .17** | .01ns | -.10ns | - |  |  |  |  |
| **9. Product evaluation** | .17** | -.01ns | -.03ns | .07ns | .03ns | -.01ns | -.08ns | .16* | - |  |  |  |
| **10. CSR attitude** | .02ns | .12ns | .13ns | .09ns | .06ns | .10ns | -.27*** | .04ns | .02ns | - |  |  |
| **11. Consumer-company identification** | .14* | -.08ns | .23*** | .15* | .14* | .20** | -.01ns | .19** | -.00ns | -.12ns | - |  |
| **12. Genderc** | .10ns | -.02ns | -.08ns | .19** | -.02ns | -.03ns | .14ns | .16* | -.09ns | -.07ns | .19* | - |
| **M (SD)** | 5.84 (.83) | 4.49 (1.60) | - | - | 6.60 (.78) | 6.71 (.65) | 1.75 (1.04) | 6.51 (.69) | 6.60 (.75) | 5.88 (1.32) | 4.92 (1.65) | - |

Note: n.s. *p* > .10, * *p* < .10, ** *p* < .05, *** *p* < .01. M = Mean, SD = Standard Deviation, a Dummy: no CSR (0) vs. CSR (1); b Dummy: non-luxury (0) vs. luxury brand (1); cDummy: female (0) vs. male (1).

**I – STUDY 2: ADDITIONAL ANALYSIS ON THE ROLE OF GUILT**

In line with existing research (Hagtvedt and Patrick 2016), we recognize that CSR may not only generate extrinsic CSR attributions, but can also reduce customers’ feelings of guilt while purchasing luxury brands. In the following, we therefore complement the results of Study 2 by showing the role of CSR in reducing guilt in the luxury context. To conduct this analysis, we additionally measured *feeling of guilt* by adapting 3 items from Kelman (1980) and Mishra and Mishra (2011). In Table 1, we provide the item wordings and the results of a confirmatory factor analysis, which demonstrate the validity and reliability of the multi-item scale for guilt.

**Table 1**. Measures and scale evaluation

| **Construct** | **Items** | **FL** | **AVE** | **CR** | **CA** | **Items based on** |
| --- | --- | --- | --- | --- | --- | --- |
| Feeling of guilt | (1) I feel guilty,  (2) I have a bad conscience.  (3) I feel bad. | 1. .91 2. .99 3. .95 | .90 | .97 | 1.00 | Kelman 1980; Mishra and Mishra (2011) |

We assessed discriminant validity using Fornell and Larcker’s (1981) criterion, which requires the AVE to exceed the squared correlations between all pairs of constructs. The measure for guilt fulfilled this requirement in support of discriminant validity. FL = factor loadings; AVE = average variance extracted; CR = composite reliability; CA = Cronbach’s alpha

Similarly to the analysis that we present in the main manuscript for extrinsic CSR attributions, we ran a two-way ANOVA with the CSR and luxury dummies (coded as 0 for no CSR and no luxury) as independent variables, guilt as the dependent variable, and salesperson customer orientation, warmth, selling orientation, and authenticity of emotional display, as well as product evaluations, CSR attitudes, consumer-company identification, and gender as control variables. The analysis revealed significant main effects of luxury (*F*(1,122) = 5.51, *p* = .02) and CSR (*F*(1,122) = 41.91, *p* < .001), as well as a significant two-way interaction of the CSR and luxury dummies on feelings of guilt (*F*(1,122) = 22.13, *p* < .001). To further investigate this interaction, we conducted simple effects analyses of the CSR dummy on feelings of guilt at different levels of luxury. In line with our expectations, the simple effects analyses revealed that *in the luxury condition*, the CSR dummy has an effect on guilt (*F*(1,122) = 62.29, *p* < .001), such that feelings of guilt are lower in the CSR group (*M* = 2.01, *SE* = .22) than in the non-CSR group (*M* = 4.46, *SE* = .21). *In the non-luxury condition,* the CSR dummy does not have a significant effect on feelings of guilt (*F*(1,122) = 1.01, *p* = .32).

In conclusion, these additional results of Study 2 corroborate Hagtvedt and Patrick’s (2016) findings by showing that CSR reduces guilt during luxury purchase decisions. We also add to the findings of Hagtvedt and Patrick (2016) by replicating their results with data from actual customers of a real company.

**References**

Hagtvedt, H., & Patrick, V. M. (2016). Gilt and guilt: Should luxury and charity partner at the point of sale? *Journal of Retailing, 92*(1), 56-64.

Kelman, H. C. (1980). The role of action in attitude change. In H.E. Howe, Jr., & M.M. Page (Eds.), *Nebraska Symposium on Motivation, 1979: Attitudes, Values, and Beliefs* (pp. 117-194). Lincoln: University of Nebraska Press.

Mishra, A., & Mishra, H. (2011). The influence of price discount versus bonus pack on the preference for virtue and vice foods”, *Journal of Marketing Research, 48*(1), 196-206.

**J – STUDIES 3-5: TREATMENT TEXTS**

| **STUDY 3** | |
| --- | --- |
| **All conditions:** Atelier Luxe, a prestigious luxury brand, produces exclusive wristwatches. The company represents the heritage of generations of designers who have developed its unique and high-status products. The products are made from the most prestigious materials, which are hand-made exclusively for Atelier Luxe using artisanal methods. The products are often seen on members of royal families, A-list celebrities, and business leaders. The company is an important supporter of “Care4Children,” a local social organization that supports disadvantaged children. This organization looks after children in need by providing recreational and educational facilities.” | |
| **Deliberation condition:** Participants read the following text:  “What are your thoughts about the company’s social engagement? Please discuss with the person next to you.”  Participants responded to the questionnaire after the discussion. | **No deliberation condition:** Participants proceeded immediately to the questionnaire. |
| **STUDY 4** | |
| **Luxury**: Atelier Luxe, a prestigious luxury brand, produces highly exclusive clothing. Through its products, Atelier Luxe attempts to symbolize power and success. The products are very expensive and exclusive, not available for everyone. The products are often seen on members of royal families, A-list celebrities, and business leaders. | **Non luxury:** CityOutfits, a popular mass-market brand, produces clothing for everyone. Through its products, CityOutfits attempts to symbolize affordability and convenience. The products are very affordable and commonplace, and available for everyone. The products are often seen on regular consumers. |
| **Internal CSR condition:** The company has a strategy to make a positive contribution to the world. To make such a contribution, they focus on the wellbeing of their own employees. The company for instance exceeds industry standards with its efforts to support its employees. Specifically, the company pays considerably above average wages and provides an exceptionally broad health care plan, extended parental leave, and paid time off to take care of family members. | **External CSR condition:** The company has a strategy to make a positive contribution to the world. To make such a contribution, they focus on donating to external social causes. The company for instance exceeds industry standards with its donations to organizations that aim to help people in need. Specifically, the company donates to some charity organizations that provide financial support and healthcare to deprived individuals. |
| **STUDY 5** | |
| **Exclusivity framing**: Atelier Luxe, a prestigious luxury brand, produces highly exclusive clothing. Through its products, Atelier Luxe attempts to symbolize power and success. The products are very expensive and exclusive, not available for everyone. The products are often seen on members of royal families, A-list celebrities, and business leaders. | **Sustainability framing:** Atelier Luxe, a green luxury brand, produces highly sustainable clothing. Through its products, Atelier Luxe attempts to symbolize respect for the environment. The products are very environmentally friendly. The products are often seen on consumers of luxury clothing who value greenness. |
| **All conditions:** The company has a strategy to make a positive contribution to the world. To make such a contribution, they focus on donating to external social causes. The company for instance exceeds industry standards with its donations to organizations that aim to help people in need. Specifically, the company donates to some charity organizations that provide financial support and healthcare to deprived individuals. | |

**K – STUDY 3: ADDITIONAL CHECKS OF THE TREATMENT TEXTS**

To make sure that the deliberation treatment did not affect perceived luxuriousness and perceived CSR of the company, we included additional checks. To measure perceived luxuriousness, we used the following item: “The company is luxurious”, anchored at 1 (completely disagree) – 7 (completely agree). As intended, a t-test revealed that the two experimental groups perceived the company as equally luxurious (*MNo deliberation* = 5.57, *SD* = 1.49; *MDeliberation* = 6.00, *SD* = 1.37; *t*(99) = 1.52, *p* = .13). Furthermore, to measure perceived CSR, we used the following item: “I have the impression that the company communicates its CSR activities”, anchored at 1 (completely disagree) – 7 (completely agree). Again, as expected, a t-test revealed that the two experimental groups perceived the company as engaging in CSR to the same extent (*MNo deliberation* = 4.76, *SD* = 1.24; *MDeliberation* = 5.16, *SD* = 1.51; *t*(98) = 1.45, *p* = .15). Thus, we conclude that our treatment text was perceived as intended.

**L - STUDIES 3-5: CORRELATIONS, MEANS, AND STANDARD DEVIATIONS**

| **Variables** | **1** | **2** | **3** | **4** |
| --- | --- | --- | --- | --- |
| **STUDY 3** | | | | |
| **1. Loyalty** | - |  |  |  |
| **2. Extrinsic CSR Attributions** | -.35*** | - |  |  |
| **3. Deliberationa** | -.36*** | .19* | - |  |
| **M (SD)** | 3.47 (1.40) | 4.90 (1.40) | - |  |
| **STUDY 4** | | | | |
| **1. Loyalty Intentions** | - |  |  |  |
| **2. Extrinsic CSR Attributions** | -.47*** | - |  |  |
| **3. Luxuryb** | -.55*** | .27*** | - |  |
| **4. Type of CSRc** | .20*** | -.08ns | -.11* | - |
| **M (SD)** | 4.89 (1.47) | 3.54 (1.42) | - | - |
| **STUDY 5** | | | | |
| **1. Loyalty Intentions** | - |  |  |  |
| **2. Extrinsic CSR Attributions** | -.40*** | - |  |  |
| **3. Luxury Brand Framingd** | .42*** | -.19** | - |  |
| **M (SD)** | 4.69 (1.26) | 3.32 (1.43) | - |  |

Note: n.s. *p* > .10, * *p* < .10, ** *p* < .05, *** *p* < .01. M = Mean, SD = Standard Deviation; aDummy: Deliberation (1) vs. Immediate Evaluation (0); b Dummy: Luxury brand (1) vs. non-luxury brand (0); cDummy: Internal CSR (1) vs. external CSR (0); dDummy: sustainability framing (1) vs. exclusivity framing (0)
